# Supplementary material
Source: publisher site journal article supplement (https://www.dovepress.com/article/436054)
Supplement: Supplementary file 1 [file get_supplementary_file.php]

**Supplementary table 1** Training details for each course

| **EM-CBRN** | | |
| --- | --- | --- |
| **Date** | **Time** | **Detail** |
| 2 November 2022 | 08.30 – 09.00 | Registration |
|  | 09.00 – 10.00 | Hand Out Questionnaires and Pre-Test |
|  | 10.00 – 11.00 | Introduction of Chemical Biological Radiation and Nuclear: CBRN (History and Principle) |
|  | 11.00 – 12.00 | CBRN Response Process |
|  | 12.00 – 13.00 | Lunch |
|  | 13.00 – 14.00 | Toxicology in Tactical |
|  | 14.20 – 14.40 | Break |
|  | 14.40 – 16.00 | General Approach and Triage in CBRN |
| 3 November 2022 | 09.00 – 10.30 | Decontamination and Treatment and Medical Operation |
|  | 10.30 – 10.40 | Break |
|  | 10.40 – 12.00 | Triage and Patient Movement |
|  | 12.00 – 13.00 | Lunch |
|  | 13.00 – 14.20 | Tabletop Exercise CBRN Event I |
|  | 14.20 – 14.40 | Break |
|  | 14.40 – 16.00 | Tabletop Exercise CBRN Event II |
| 4 November 2022 | 09.00 – 12.00 | Demonstration CBRN Operation |
|  | 12.00 – 13.00 | Lunch |
|  | 13.00 – 14.00 | After Action Review |
|  | 14.00 – 16.00 | Hand Out Questionnaires and Post-Test |
| **TTEMS course** | | |
| | **Date** | **Time** | **Detail** | | --- | --- | --- | | | |
| 7 November 2022 | 08.30 – 09.00 | Registration |
|  | 09.00 – 10.00 | Hand Out Questionnaires and Pre-Test |
|  | 10.00 – 11.00 | Injury mechanism and cause of death |
|  | 11.00 – 12.00 | Medical operation team and relevant operations |
|  | 12.00 – 13.00 น. | Lunch |
|  | 13.00 – 14.00 น. | Incident Command System (ICS) in special situations |
|  | 14.20 – 14.40 น. | Break |
|  | 14.40 – 16.00 | TTEMS practice |
| 8 November 2022 | 09.00 – 10.00 | Patient assistance operation steps in special situations |
|  | 10.00 – 11.00 | Medical situation evaluation and reporting in special situations |
|  | 11.00 – 12.00 | Assistance of patients with respiratory and chest injuries in special situations |
|  | 12.00 – 13.00 | Lunch |
|  | 13.00 – 14.20 | Patient assistance with hemostatic techniques in special situations |
|  | 14.20 – 14.40 | Break |
|  | 14.40 – 16.00 | Patient transportation in special situations |
| 9 November 2022 | 09.00 – 12.00 | Practice: preparation in medical operation team building in special situations I |
|  | 12.00 – 13.00 | Lunch |
|  | 13.00 – 14.00 | Practice: preparation in medical operation team building in special situations II |
|  | 14.00 – 16.00 | Hand Out Questionnaires and Post-Test |
| **CPD course** | | |
| | **Date** | **Time** | **Detail** | | --- | --- | --- | | | |
| 10 November 2022 | 08.30 – 09.00 | Registration |
|  | 09.00 – 10.00 | Hand Out Questionnaires and Pre-Test |
|  | 10.00 – 11.00 | Disaster Management, Disaster Cycle and CSCATTT |
|  | 11.00 – 12.00 | Principle of Incident Command System in Disaster |
|  | 12.00 – 13.00 | Lunch |
|  | 13.00 – 14.00 | Disaster management plan of Erawan Center, Bangkok |
|  | 14.20 – 14.40 | Break |
|  | 14.40 – 16.00 | Group Discussion |
| 11 November 2022 | 09.00 – 10.00 | Practice in disaster course |
|  | 10.00 – 11.00 | Trauma Care in High Threat Environment |
|  | 11.00 – 12.00 | Table Top in Situation I |
|  | 12.00 – 13.00 | Lunch |
|  | 13.00 – 14.20 | Table Top in Situation II |
|  | 14.20 – 14.40 | Break |
|  | 14.40 – 16.00 | Hand Out Questionnaires and Post-Test |
